# Supplementary material
Source: PubMed Central journal article supplement (PMC2824608)

1 **ONLINE REPOSITORY**

2

3 TITLE PAGE

4

5 Original Article

6

7 **Genome-wide association study of asthma identifies RAD50-IL13 and HLA-DR/DQ regions**

8

9 Xingnan Li, PhD,<sup>1,\*</sup> Timothy D. Howard, PhD,<sup>1,\*</sup> Siqun L. Zheng, MD,<sup>1</sup> Tmirah Haselkorn,  
10 PhD,<sup>2</sup> Stephen P. Peters, MD, PhD,<sup>1</sup> Deborah A. Meyers, PhD,<sup>1</sup> and Eugene R. Bleeker, MD<sup>1</sup>

11

12 <sup>1</sup>Center for Human Genomics, Wake Forest University School of Medicine, Winston Salem, NC;

13 <sup>2</sup>EpiMetrix, Inc., Sunnyvale, California;

14 \*Contributed equally to this manuscript

15

16 **Corresponding author**

17 Deborah A. Meyers, PhD

18 Center for Human Genomics

19 Wake Forest University School of Medicine

20 Medical Center Boulevard

21 Winston-Salem, NC 27157

22

23 Telephone: 336-713-7500

24 Fax: 336-713-7566

25 Email: [dmeayers@wfubmc.edu](mailto:dmeayers@wfubmc.edu)

26

27 **Table E1.** Association results of 248 SNPs with GC-adjusted P values  $\leq 1.0E-03$ 

28

| SNP        | UNADJ P value | GC-ADJ P value | Chr | Coordinate | Gene            | Location      |
|------------|---------------|----------------|-----|------------|-----------------|---------------|
| rs2244012  | 3.04E-07      | 7.69E-07       | 5   | 131929124  | <i>RAD50</i>    | intron        |
| rs6871536  | 9.03E-07      | 2.13E-06       | 5   | 131997773  | <i>RAD50</i>    | intron        |
| rs17525472 | 1.50E-06      | 3.41E-06       | 15  | 49756960   | <i>SCG3</i>     | flanking_5UTR |
| rs2897443  | 2.74E-06      | 5.99E-06       | 5   | 131957493  | <i>RAD50</i>    | intron        |
| rs4815617  | 7.92E-06      | 1.62E-05       | 20  | 3775309    | <i>KIAA1271</i> | flanking_5UTR |
| rs1063355  | 9.55E-06      | 1.93E-05       | 6   | 32735692   | <i>HLA-DQB1</i> | 3UTR          |
| rs9275312  | 1.13E-05      | 2.25E-05       | 6   | 32773706   | <i>HLA-DQB1</i> | flanking_5UTR |
| rs10493343 | 1.37E-05      | 2.69E-05       | 1   | 63486112   | <i>FOXD3</i>    | flanking_5UTR |
| rs8020818  | 2.14E-05      | 4.09E-05       | 14  | 100753214  | <i>FLJ41170</i> | flanking_3UTR |
| rs6861032  | 2.29E-05      | 4.36E-05       | 5   | 174833658  | <i>SFXN1</i>    | flanking_5UTR |
| rs17275283 | 2.30E-05      | 4.39E-05       | 11  | 96347024   | <i>JRKL</i>     | flanking_3UTR |
| rs6958325  | 2.33E-05      | 4.43E-05       | 7   | 110464892  | <i>LRRN3</i>    | flanking_5UTR |
| rs2516049  | 2.62E-05      | 4.95E-05       | 6   | 32678378   | <i>HLA-DRB1</i> | flanking_5UTR |
| rs2239804  | 2.80E-05      | 5.26E-05       | 6   | 32519501   | <i>HLA-DRA</i>  | intron        |
| rs967676   | 3.18E-05      | 5.92E-05       | 17  | 47315308   | <i>CA10</i>     | intron        |
| rs723498   | 3.25E-05      | 6.05E-05       | 17  | 65787127   | <i>KCNJ2</i>    | flanking_3UTR |
| rs16909520 | 3.81E-05      | 7.01E-05       | 11  | 5041830    | <i>OR52E2</i>   | flanking_5UTR |
| rs13159461 | 3.89E-05      | 7.16E-05       | 5   | 1256437    | <i>SLC6A19</i>  | intron        |
| rs2277968  | 4.27E-05      | 7.80E-05       | 19  | 9932669    | <i>COL5A3</i>   | intron        |
| rs1411164  | 4.46E-05      | 8.14E-05       | 9   | 72844892   | <i>TRPM3</i>    | intron        |
| rs11770226 | 4.69E-05      | 8.52E-05       | 7   | 94923367   | <i>PON2</i>     | flanking_5UTR |
| rs10496855 | 4.90E-05      | 8.88E-05       | 2   | 141354850  | <i>LRP1B</i>    | intron        |
| rs326234   | 5.12E-05      | 9.26E-05       | 7   | 130526092  | <i>MKLN1</i>    | flanking_5UTR |
| rs1859600  | 5.38E-05      | 9.69E-05       | 7   | 26509841   | <i>SNX10</i>    | flanking_3UTR |
| rs3180361  | 5.83E-05      | 1.04E-04       | 7   | 26503438   | <i>SNX10</i>    | flanking_3UTR |

|            |          |          |    |           |                  |               |
|------------|----------|----------|----|-----------|------------------|---------------|
| rs359486   | 6.11E-05 | 1.09E-04 | 4  | 163127283 | <i>FSTL5</i>     | intron        |
| rs757393   | 6.26E-05 | 1.12E-04 | 7  | 26498670  | <i>SNX10</i>     | flanking_3UTR |
| rs1328589  | 6.50E-05 | 1.16E-04 | 1  | 63447502  | <i>FOXD3</i>     | flanking_5UTR |
| rs646297   | 6.98E-05 | 1.24E-04 | 23 | 71455300  | <i>HDAC8</i>     | flanking_3UTR |
| rs3181096  | 7.12E-05 | 1.26E-04 | 2  | 204278337 | <i>CD28</i>      | flanking_5UTR |
| rs9268542  | 8.55E-05 | 1.49E-04 | 6  | 32492699  | <i>BTNL2</i>     | flanking_5UTR |
| rs2395185  | 8.73E-05 | 1.52E-04 | 6  | 32541145  | <i>HLA-DRA</i>   | flanking_3UTR |
| rs655198   | 8.87E-05 | 1.55E-04 | 1  | 42098604  | <i>HIVEP3</i>    | intron        |
| rs2280229  | 9.15E-05 | 1.59E-04 | 6  | 45651316  | <i>RUNX2</i>     | flanking_3UTR |
| rs5000634  | 9.16E-05 | 1.59E-04 | 6  | 32771542  | <i>HLA-DQB1</i>  | flanking_5UTR |
| rs11079992 | 9.24E-05 | 1.61E-04 | 17 | 47572536  | <i>CA10</i>      | intron        |
| rs3001156  | 9.46E-05 | 1.64E-04 | 1  | 192817561 | <i>CDC73</i>     | flanking_3UTR |
| rs4867956  | 9.54E-05 | 1.66E-04 | 5  | 169676190 | <i>LOC257358</i> | flanking_5UTR |
| rs5928535  | 9.65E-05 | 1.67E-04 | 23 | 34313383  | <i>TMEM47</i>    | flanking_3UTR |
| rs6779474  | 9.90E-05 | 1.71E-04 | 3  | 182738502 | <i>SOX2</i>      | flanking_5UTR |
| rs7144274  | 9.94E-05 | 1.72E-04 | 14 | 77695406  | <i>ADCK1</i>     | flanking_3UTR |
| rs1916804  | 9.98E-05 | 1.73E-04 | 2  | 228516940 | <i>WDR69</i>     | flanking_3UTR |
| rs2938140  | 1.06E-04 | 1.83E-04 | 17 | 47531500  | <i>CA10</i>      | intron        |
| rs362112   | 1.14E-04 | 1.95E-04 | 22 | 33793994  | <i>RAXLX</i>     | intron        |
| rs9296461  | 1.19E-04 | 2.03E-04 | 6  | 45659449  | <i>RUNX2</i>     | flanking_3UTR |
| rs6848139  | 1.21E-04 | 2.07E-04 | 4  | 123614491 | <i>IL2</i>       | flanking_5UTR |
| rs6860112  | 1.26E-04 | 2.14E-04 | 5  | 4189154   | <i>IRX1</i>      | flanking_3UTR |
| rs9810311  | 1.29E-04 | 2.19E-04 | 3  | 31456330  | <i>STT3B</i>     | flanking_5UTR |
| rs4953456  | 1.30E-04 | 2.20E-04 | 2  | 47144074  | <i>TTC7A</i>     | intron        |
| rs643930   | 1.30E-04 | 2.21E-04 | 1  | 206224964 | <i>PLXNA2</i>    | flanking_3UTR |
| rs6551207  | 1.30E-04 | 2.21E-04 | 3  | 27527986  | <i>SLC4A7</i>    | flanking_5UTR |
| rs9885995  | 1.31E-04 | 2.22E-04 | 7  | 20579891  | <i>ABCB5</i>     | flanking_5UTR |
| rs2243204  | 1.31E-04 | 2.23E-04 | 5  | 132027393 | <i>IL13</i>      | flanking_3UTR |
| rs9346917  | 1.32E-04 | 2.24E-04 | 6  | 162834976 | <i>PARK2</i>     | flanking_5UTR |

|            |          |          |    |           |                 |               |
|------------|----------|----------|----|-----------|-----------------|---------------|
| rs12995456 | 1.39E-04 | 2.35E-04 | 2  | 2573621   | <i>MYT1L</i>    | flanking_5UTR |
| rs12352086 | 1.41E-04 | 2.39E-04 | 9  | 25707537  | <i>TUSC1</i>    | flanking_5UTR |
| rs770918   | 1.49E-04 | 2.52E-04 | 1  | 98701525  | <i>SNX7</i>     | flanking_5UTR |
| rs2329020  | 1.52E-04 | 2.56E-04 | 3  | 49660077  | <i>BSN</i>      | intron        |
| rs1542112  | 1.55E-04 | 2.61E-04 | 15 | 96669517  | <i>FLJ39743</i> | flanking_3UTR |
| rs8020795  | 1.59E-04 | 2.67E-04 | 14 | 67559788  | <i>RAD51L1</i>  | intron        |
| rs525247   | 1.60E-04 | 2.69E-04 | 6  | 81696055  | <i>BCKDHB</i>   | flanking_3UTR |
| rs931992   | 1.61E-04 | 2.70E-04 | 17 | 35074961  | <i>TCAP</i>     | flanking_5UTR |
| rs2967675  | 1.64E-04 | 2.74E-04 | 19 | 8650484   | <i>MGC33407</i> | flanking_3UTR |
| rs141155   | 1.66E-04 | 2.78E-04 | 17 | 65865187  | <i>KCNJ2</i>    | flanking_3UTR |
| rs9275141  | 1.77E-04 | 2.94E-04 | 6  | 32759095  | <i>HLA-DQB1</i> | flanking_5UTR |
| rs2056317  | 1.77E-04 | 2.95E-04 | 15 | 35350843  | <i>MEIS2</i>    | flanking_5UTR |
| rs11746935 | 1.78E-04 | 2.97E-04 | 5  | 127650646 | <i>FBN2</i>     | intron        |
| rs9906612  | 1.80E-04 | 3.00E-04 | 17 | 34801157  | <i>FBXL20</i>   | intron        |
| rs10233470 | 1.83E-04 | 3.04E-04 | 7  | 20525526  | <i>ITGB8</i>    | flanking_3UTR |
| rs12324805 | 1.84E-04 | 3.06E-04 | 15 | 80139255  | <i>RKHD3</i>    | flanking_5UTR |
| rs1029322  | 1.85E-04 | 3.08E-04 | 1  | 7318619   | <i>CAMTA1</i>   | intron        |
| rs456084   | 1.86E-04 | 3.08E-04 | 15 | 60404524  | <i>FLJ38723</i> | flanking_5UTR |
| rs7241842  | 1.86E-04 | 3.08E-04 | 18 | 33126739  | <i>BRUNOL4</i>  | intron        |
| rs1135889  | 1.86E-04 | 3.09E-04 | 17 | 71437716  | <i>ACOX1</i>    | flanking_3UTR |
| rs10948239 | 1.86E-04 | 3.09E-04 | 6  | 45644058  | <i>RUNX2</i>    | flanking_3UTR |
| rs996812   | 1.87E-04 | 3.10E-04 | 1  | 81229634  | <i>LPHN2</i>    | flanking_5UTR |
| rs11701    | 1.88E-04 | 3.13E-04 | 14 | 20231893  | <i>ANG</i>      | coding        |
| rs556458   | 1.90E-04 | 3.15E-04 | 6  | 81687679  | <i>BCKDHB</i>   | flanking_3UTR |
| rs10500350 | 1.93E-04 | 3.20E-04 | 16 | 7170644   | <i>A2BP1</i>    | intron        |
| rs1541533  | 1.94E-04 | 3.21E-04 | 11 | 17052787  | <i>RNU14</i>    | 3UTR          |
| rs17623690 | 1.99E-04 | 3.29E-04 | 13 | 58702026  | <i>DIAPH3</i>   | flanking_3UTR |
| rs7456530  | 2.00E-04 | 3.31E-04 | 7  | 56011943  | <i>GBAS</i>     | intron        |
| rs2830865  | 2.00E-04 | 3.31E-04 | 21 | 27649571  | <i>ADAMTS5</i>  | flanking_5UTR |

|            |          |          |    |           |                   |               |
|------------|----------|----------|----|-----------|-------------------|---------------|
| rs3782309  | 2.02E-04 | 3.34E-04 | 12 | 26750663  | <i>ITPR2</i>      | intron        |
| rs660895   | 2.02E-04 | 3.34E-04 | 6  | 32685358  | <i>HLA-DRB1</i>   | flanking_5UTR |
| rs359512   | 2.06E-04 | 3.41E-04 | 4  | 163100537 | <i>FSTL5</i>      | intron        |
| rs4601994  | 2.13E-04 | 3.51E-04 | 15 | 84235520  | <i>KLHL25</i>     | flanking_5UTR |
| rs7214151  | 2.15E-04 | 3.55E-04 | 17 | 34761298  | <i>FBXL20</i>     | intron        |
| rs1956534  | 2.17E-04 | 3.56E-04 | 14 | 67963825  | <i>RAD51L1</i>    | intron        |
| rs312729   | 2.18E-04 | 3.58E-04 | 17 | 65818432  | <i>KCNJ2</i>      | flanking_3UTR |
| rs6696780  | 2.21E-04 | 3.63E-04 | 1  | 76504495  | <i>ST6GALNAC3</i> | intron        |
| rs1295686  | 2.21E-04 | 3.63E-04 | 5  | 132023742 | <i>IL13</i>       | intron        |
| rs7577607  | 2.25E-04 | 3.69E-04 | 2  | 192414794 | <i>SDPR</i>       | intron        |
| rs9563026  | 2.26E-04 | 3.71E-04 | 13 | 50591509  | <i>GUCY1B2</i>    | flanking_5UTR |
| rs10146353 | 2.27E-04 | 3.72E-04 | 14 | 77705251  | <i>NRXN3</i>      | flanking_5UTR |
| rs2307127  | 2.28E-04 | 3.73E-04 | 11 | 128817282 | <i>BARX2</i>      | intron        |
| rs739107   | 2.29E-04 | 3.76E-04 | 22 | 47195099  | <i>FAM19A5</i>    | flanking_5UTR |
| rs16988492 | 2.31E-04 | 3.79E-04 | 23 | 72479814  | <i>CDX4</i>       | flanking_5UTR |
| rs1543540  | 2.32E-04 | 3.81E-04 | 14 | 101867808 | <i>C14orf131</i>  | 5UTR          |
| rs2111996  | 2.33E-04 | 3.81E-04 | 10 | 107461332 | <i>SORCS3</i>     | flanking_3UTR |
| rs5992495  | 2.33E-04 | 3.81E-04 | 22 | 18262984  | <i>TXNRD2</i>     | coding        |
| rs2025753  | 2.37E-04 | 3.87E-04 | 6  | 51805526  | <i>PKHD1</i>      | intron        |
| rs45426    | 2.39E-04 | 3.91E-04 | 4  | 163113553 | <i>FSTL5</i>      | intron        |
| rs2380945  | 2.39E-04 | 3.91E-04 | 2  | 141384793 | <i>LRP1B</i>      | intron        |
| rs20541    | 2.50E-04 | 4.07E-04 | 5  | 132023863 | <i>IL13</i>       | coding        |
| rs1444393  | 2.50E-04 | 4.08E-04 | 18 | 35540370  | <i>BRUNOL4</i>    | flanking_5UTR |
| rs11765081 | 2.53E-04 | 4.13E-04 | 7  | 88312832  | <i>MGC26647</i>   | flanking_5UTR |
| rs14138    | 2.56E-04 | 4.16E-04 | 2  | 46267950  | <i>PRKCE</i>      | 3UTR          |
| rs983789   | 2.57E-04 | 4.18E-04 | 1  | 157862306 | <i>APCS</i>       | flanking_3UTR |
| rs904132   | 2.57E-04 | 4.19E-04 | 4  | 55496865  | <i>KDR</i>        | flanking_3UTR |
| rs9299508  | 2.58E-04 | 4.20E-04 | 10 | 73213459  | <i>CDH23</i>      | intron        |
| rs1544412  | 2.61E-04 | 4.24E-04 | 7  | 26465493  | <i>SNX10</i>      | flanking_3UTR |

|            |          |          |    |           |                 |               |
|------------|----------|----------|----|-----------|-----------------|---------------|
| rs6577395  | 2.61E-04 | 4.25E-04 | 1  | 6914512   | <i>CAMTA1</i>   | intron        |
| rs10951140 | 2.62E-04 | 4.26E-04 | 7  | 26498245  | <i>SNX10</i>    | flanking_3UTR |
| rs688540   | 2.63E-04 | 4.27E-04 | 1  | 47775034  | <i>FOXD2</i>    | flanking_3UTR |
| rs2189556  | 2.67E-04 | 4.33E-04 | 7  | 26461733  | <i>SNX10</i>    | flanking_3UTR |
| rs12574869 | 2.70E-04 | 4.37E-04 | 11 | 5029677   | <i>OR52J3</i>   | flanking_3UTR |
| rs1579333  | 2.73E-04 | 4.42E-04 | 16 | 73710475  | <i>LDHD</i>     | flanking_5UTR |
| rs9874701  | 2.74E-04 | 4.43E-04 | 3  | 16130293  | <i>GALNTL2</i>  | flanking_5UTR |
| rs2823048  | 2.76E-04 | 4.47E-04 | 21 | 15384139  | <i>NRIP1</i>    | flanking_5UTR |
| rs359508   | 2.77E-04 | 4.49E-04 | 4  | 163103214 | <i>FSTL5</i>    | intron        |
| rs179988   | 2.79E-04 | 4.51E-04 | 6  | 16446200  | <i>ATXN1</i>    | intron        |
| rs7208487  | 2.79E-04 | 4.51E-04 | 17 | 34796975  | <i>FBXL20</i>   | intron        |
| rs1350406  | 2.79E-04 | 4.52E-04 | 6  | 77542029  | <i>HTR1B</i>    | flanking_3UTR |
| rs315791   | 2.94E-04 | 4.74E-04 | 5  | 169668498 | <i>LCP2</i>     | flanking_5UTR |
| rs12373339 | 2.94E-04 | 4.75E-04 | 18 | 32632020  | <i>C18orf10</i> | intron        |
| rs1877031  | 3.00E-04 | 4.83E-04 | 17 | 35067606  | <i>STARD3</i>   | coding        |
| rs1474454  | 3.03E-04 | 4.88E-04 | 17 | 36045007  | <i>SMARCE1</i>  | intron        |
| rs1873288  | 3.03E-04 | 4.88E-04 | 13 | 84779125  | <i>SLITRK6</i>  | flanking_3UTR |
| rs11938388 | 3.05E-04 | 4.90E-04 | 4  | 7169428   | <i>GRPEL1</i>   | flanking_5UTR |
| rs511625   | 3.05E-04 | 4.91E-04 | 2  | 141066570 | <i>LRP1B</i>    | intron        |
| rs1530758  | 3.10E-04 | 4.99E-04 | 2  | 23212606  | <i>UBXD4</i>    | flanking_5UTR |
| rs10783425 | 3.11E-04 | 4.99E-04 | 12 | 49916559  | <i>DAZAP2</i>   | flanking_5UTR |
| rs926929   | 3.15E-04 | 5.07E-04 | 10 | 83837968  | <i>NRG3</i>     | intron        |
| rs4959689  | 3.16E-04 | 5.07E-04 | 6  | 2562121   | <i>C6orf195</i> | flanking_3UTR |
| rs11635084 | 3.16E-04 | 5.08E-04 | 15 | 76473878  | <i>IREB2</i>    | flanking_5UTR |
| rs2838906  | 3.19E-04 | 5.11E-04 | 21 | 45646335  | <i>COL18A1</i>  | flanking_5UTR |
| rs9966349  | 3.24E-04 | 5.20E-04 | 18 | 53442584  | <i>NARS</i>     | intron        |
| rs4909638  | 3.28E-04 | 5.25E-04 | 8  | 138323508 | <i>C8ORFK32</i> | flanking_3UTR |
| rs2830863  | 3.32E-04 | 5.31E-04 | 21 | 27649080  | <i>ADAMTS5</i>  | flanking_5UTR |
| rs3750340  | 3.32E-04 | 5.31E-04 | 9  | 130812210 | <i>SH3GLB2</i>  | intron        |

|            |          |          |    |           |                 |               |
|------------|----------|----------|----|-----------|-----------------|---------------|
| rs9417254  | 3.36E-04 | 5.37E-04 | 10 | 20055938  | <i>PLXDC2</i>   | flanking_5UTR |
| rs2275593  | 3.36E-04 | 5.38E-04 | 14 | 103709764 | <i>TDRD9</i>    | flanking_3UTR |
| rs9789945  | 3.36E-04 | 5.38E-04 | 3  | 31452286  | <i>STT3B</i>    | flanking_5UTR |
| rs7896565  | 3.39E-04 | 5.42E-04 | 10 | 123382368 | <i>FGFR2</i>    | flanking_5UTR |
| rs8056241  | 3.40E-04 | 5.43E-04 | 16 | 55685889  | <i>CPNE2</i>    | intron        |
| rs1549709  | 3.49E-04 | 5.56E-04 | 2  | 141375997 | <i>LRP1B</i>    | intron        |
| rs6795028  | 3.50E-04 | 5.58E-04 | 3  | 88563780  | <i>C3orf38</i>  | flanking_3UTR |
| rs957781   | 3.51E-04 | 5.60E-04 | 2  | 196500819 | <i>DNAH7</i>    | intron        |
| rs12338788 | 3.53E-04 | 5.63E-04 | 9  | 115253879 | <i>RGS3</i>     | flanking_5UTR |
| rs10485961 | 3.53E-04 | 5.63E-04 | 7  | 78977339  | <i>MAGI2</i>    | flanking_5UTR |
| rs4902538  | 3.55E-04 | 5.66E-04 | 14 | 67494562  | <i>RAD51L1</i>  | intron        |
| rs1901548  | 3.56E-04 | 5.68E-04 | 6  | 159818518 | <i>FLJ27255</i> | flanking_3UTR |
| rs1861828  | 3.58E-04 | 5.71E-04 | 9  | 89434951  | <i>DAPK1</i>    | intron        |
| rs4523612  | 3.61E-04 | 5.74E-04 | 10 | 120273282 | <i>PRLHR</i>    | flanking_3UTR |
| rs727152   | 3.61E-04 | 5.75E-04 | 11 | 3976341   | <i>STIM1</i>    | intron        |
| rs2066381  | 3.64E-04 | 5.79E-04 | 1  | 239062050 | <i>RGS7</i>     | intron        |
| rs3897638  | 3.64E-04 | 5.80E-04 | 18 | 33151448  | <i>BRUNOL4</i>  | intron        |
| rs2834280  | 3.67E-04 | 5.84E-04 | 21 | 34150372  | <i>ITSN1</i>    | intron        |
| rs986032   | 3.67E-04 | 5.84E-04 | 1  | 168549668 | <i>SCYL1BP1</i> | flanking_5UTR |
| rs1769807  | 3.72E-04 | 5.91E-04 | 1  | 229718014 | <i>TSNAX</i>    | flanking_5UTR |
| rs4621354  | 3.74E-04 | 5.94E-04 | 3  | 175070962 | <i>NLGN1</i>    | intron        |
| rs6535363  | 3.74E-04 | 5.94E-04 | 4  | 83781593  | <i>SCD5</i>     | flanking_3UTR |
| rs203066   | 3.74E-04 | 5.95E-04 | 17 | 47349497  | <i>CA10</i>     | intron        |
| rs3917254  | 3.79E-04 | 6.01E-04 | 2  | 102142950 | <i>IL1R1</i>    | intron        |
| rs4866207  | 3.82E-04 | 6.07E-04 | 5  | 20700523  | <i>CDH18</i>    | flanking_5UTR |
| rs2866823  | 3.87E-04 | 6.14E-04 | 20 | 39912917  | <i>PTPRT</i>    | flanking_3UTR |
| rs202124   | 3.89E-04 | 6.17E-04 | 17 | 47342798  | <i>CA10</i>     | intron        |
| rs134774   | 3.89E-04 | 6.17E-04 | 22 | 49427626  | <i>ARSA</i>     | flanking_5UTR |
| rs7719641  | 3.89E-04 | 6.17E-04 | 5  | 41360498  | <i>PLCXD3</i>   | intron        |



|            |          |          |    |           |                  |               |
|------------|----------|----------|----|-----------|------------------|---------------|
| rs10760397 | 3.89E-04 | 6.17E-04 | 9  | 127173028 | <i>GAPVD1</i>    | flanking_3UTR |
| rs723923   | 3.90E-04 | 6.18E-04 | 23 | 72267781  | <i>LOC340529</i> | flanking_5UTR |
| rs7054904  | 3.90E-04 | 6.18E-04 | 23 | 72274502  | <i>LOC340529</i> | flanking_5UTR |
| rs861475   | 3.90E-04 | 6.19E-04 | 1  | 206118011 | <i>CD34</i>      | flanking_3UTR |
| rs208358   | 3.91E-04 | 6.19E-04 | 7  | 2740131   | <i>GNA12</i>     | intron        |
| rs6962263  | 3.96E-04 | 6.26E-04 | 7  | 88328758  | <i>MGC26647</i>  | flanking_5UTR |
| rs902810   | 3.96E-04 | 6.27E-04 | 14 | 98537686  | <i>BCL11B</i>    | flanking_3UTR |
| rs2822687  | 3.98E-04 | 6.29E-04 | 21 | 14775306  | <i>SAMSN1</i>    | flanking_3UTR |
| rs10493817 | 3.98E-04 | 6.30E-04 | 1  | 88899475  | <i>PKN2</i>      | flanking_5UTR |
| rs6719500  | 3.98E-04 | 6.30E-04 | 2  | 196533647 | <i>DNAH7</i>     | coding        |
| rs7393606  | 3.98E-04 | 6.30E-04 | 10 | 134906487 | <i>VENTX</i>     | flanking_3UTR |
| rs1244459  | 3.99E-04 | 6.31E-04 | 10 | 7968246   | <i>ATP5C1</i>    | flanking_3UTR |
| rs7688489  | 4.00E-04 | 6.32E-04 | 4  | 109906763 | <i>AGXT2L1</i>   | flanking_5UTR |
| rs6544127  | 4.00E-04 | 6.33E-04 | 2  | 38073146  | <i>FAM82A</i>    | intron        |
| rs767325   | 4.01E-04 | 6.34E-04 | 17 | 47260643  | <i>CA10</i>      | intron        |
| rs2106365  | 4.02E-04 | 6.36E-04 | 16 | 22830079  | <i>HS3ST2</i>    | intron        |
| rs10485285 | 4.03E-04 | 6.38E-04 | 6  | 81535326  | <i>BCKDHB</i>    | flanking_3UTR |
| rs10801687 | 4.13E-04 | 6.52E-04 | 1  | 89079849  | <i>PKN2</i>      | flanking_3UTR |
| rs1019595  | 4.14E-04 | 6.54E-04 | 10 | 82575930  | <i>SH2D4B</i>    | flanking_3UTR |
| rs867389   | 4.19E-04 | 6.60E-04 | 1  | 6907656   | <i>CAMTA1</i>    | intron        |
| rs10875660 | 4.20E-04 | 6.63E-04 | 12 | 46220298  | <i>FLJ21908</i>  | flanking_3UTR |
| rs9677948  | 4.23E-04 | 6.67E-04 | 2  | 55290438  | <i>FLJ31438</i>  | coding        |
| rs7304994  | 4.30E-04 | 6.77E-04 | 12 | 8883237   | <i>A2ML1</i>     | intron        |
| rs12601221 | 4.38E-04 | 6.89E-04 | 17 | 65919990  | <i>KCNJ2</i>     | flanking_3UTR |
| rs889608   | 4.40E-04 | 6.91E-04 | 16 | 85895044  | <i>FBXO31</i>    | flanking_3UTR |
| rs2041992  | 4.42E-04 | 6.94E-04 | 19 | 51216311  | <i>PGLYRP1</i>   | intron        |
| rs2273866  | 4.44E-04 | 6.98E-04 | 9  | 130742712 | <i>PHYHD1</i>    | coding        |
| rs7623955  | 4.44E-04 | 6.98E-04 | 3  | 16014062  | <i>ANKRD28</i>   | flanking_5UTR |
| rs875339   | 4.46E-04 | 7.00E-04 | 15 | 58883347  | <i>RORA</i>      | intron        |

|            |          |          |    |           |                  |               |
|------------|----------|----------|----|-----------|------------------|---------------|
| rs1507741  | 4.47E-04 | 7.02E-04 | 1  | 161224435 | <i>RGS4</i>      | flanking_5UTR |
| rs10883109 | 4.48E-04 | 7.04E-04 | 10 | 100247350 | <i>HPSE2</i>     | intron        |
| rs6738615  | 4.52E-04 | 7.10E-04 | 2  | 222599119 | <i>PAX3</i>      | flanking_3UTR |
| rs2933192  | 4.55E-04 | 7.13E-04 | 14 | 46456191  | <i>MAMDC1</i>    | intron        |
| rs3738795  | 4.59E-04 | 7.20E-04 | 1  | 90139102  | <i>LRRC8D</i>    | intron        |
| rs1565922  | 4.63E-04 | 7.25E-04 | 17 | 35084561  | <i>PERLD1</i>    | intron        |
| rs205764   | 4.66E-04 | 7.30E-04 | 7  | 130248776 | <i>KLF14</i>     | flanking_5UTR |
| rs10496858 | 4.66E-04 | 7.30E-04 | 2  | 141356115 | <i>LRP1B</i>     | intron        |
| rs289107   | 4.66E-04 | 7.30E-04 | 15 | 60417907  | <i>FLJ38723</i>  | flanking_5UTR |
| rs2070393  | 4.66E-04 | 7.31E-04 | 21 | 34160957  | <i>ITSN1</i>     | intron        |
| rs1575847  | 4.71E-04 | 7.37E-04 | 7  | 94308081  | <i>SGCE</i>      | flanking_5UTR |
| rs6007798  | 4.71E-04 | 7.38E-04 | 22 | 46860129  | <i>LOC388915</i> | flanking_5UTR |
| rs3761353  | 4.75E-04 | 7.43E-04 | 21 | 34193743  | <i>ATP5O</i>     | flanking_3UTR |
| rs3197999  | 4.82E-04 | 7.54E-04 | 3  | 49696536  | <i>MST1</i>      | coding        |
| rs1565611  | 4.85E-04 | 7.58E-04 | 14 | 98543918  | <i>BCL11B</i>    | flanking_3UTR |
| rs716066   | 4.88E-04 | 7.63E-04 | 11 | 120721777 | <i>SC5DL</i>     | flanking_3UTR |
| rs606850   | 4.91E-04 | 7.66E-04 | 1  | 42047721  | <i>HIVEP3</i>    | intron        |
| rs4684448  | 4.91E-04 | 7.66E-04 | 3  | 4871495   | <i>ITPR1</i>     | flanking_3UTR |
| rs1475091  | 4.97E-04 | 7.75E-04 | 23 | 71490721  | <i>HDAC8</i>     | intron        |
| rs3859956  | 5.08E-04 | 7.92E-04 | 23 | 43738241  | <i>NDP</i>       | flanking_5UTR |
| rs4657210  | 5.12E-04 | 7.97E-04 | 1  | 160854047 | <i>DDR2</i>      | flanking_5UTR |
| rs2271308  | 5.13E-04 | 7.99E-04 | 17 | 35071008  | <i>STARD3</i>    | intron        |
| rs462954   | 5.14E-04 | 8.00E-04 | 13 | 91169091  | <i>GPC5</i>      | intron        |
| rs1003385  | 5.17E-04 | 8.04E-04 | 12 | 114236286 | <i>TBX3</i>      | flanking_5UTR |
| rs1552741  | 5.18E-04 | 8.05E-04 | 14 | 46414182  | <i>MAMDC1</i>    | intron        |
| rs4600441  | 5.18E-04 | 8.07E-04 | 15 | 25127607  | <i>GABRG3</i>    | flanking_5UTR |
| rs2217008  | 5.19E-04 | 8.07E-04 | 4  | 153169194 | <i>PET112L</i>   | flanking_5UTR |
| rs7601     | 5.20E-04 | 8.09E-04 | 15 | 89310596  | <i>PRCI</i>      | 3UTR          |
| rs943997   | 5.23E-04 | 8.13E-04 | 14 | 20535329  | <i>FLJ20859</i>  | flanking_3UTR |

|            |          |          |    |           |                  |               |
|------------|----------|----------|----|-----------|------------------|---------------|
| rs547311   | 5.24E-04 | 8.15E-04 | 7  | 130248994 | <i>KLF14</i>     | flanking_5UTR |
| rs13131255 | 5.25E-04 | 8.16E-04 | 4  | 31806809  | <i>PCDH7</i>     | flanking_3UTR |
| rs730489   | 5.27E-04 | 8.18E-04 | 6  | 151441584 | <i>MTHFD1L</i>   | intron        |
| rs12685378 | 5.29E-04 | 8.22E-04 | 9  | 130787532 | <i>NUP188</i>    | intron        |
| rs9571705  | 5.31E-04 | 8.25E-04 | 13 | 66451841  | <i>PCDH9</i>     | intron        |
| rs311384   | 5.32E-04 | 8.27E-04 | 19 | 52147155  | <i>GRLF1</i>     | intron        |
| rs12464787 | 5.35E-04 | 8.31E-04 | 2  | 179148275 | <i>TTN</i>       | coding        |
| rs4073051  | 5.37E-04 | 8.34E-04 | 1  | 24780002  | <i>C1orf130</i>  | intron        |
| rs2293700  | 5.38E-04 | 8.35E-04 | 19 | 40688220  | <i>ZD52F10</i>   | intron        |
| rs203049   | 5.39E-04 | 8.36E-04 | 17 | 47433988  | <i>CA10</i>      | intron        |
| rs4985019  | 5.43E-04 | 8.42E-04 | 16 | 9019717   | <i>USP7</i>      | flanking_5UTR |
| rs2054892  | 5.46E-04 | 8.47E-04 | 3  | 178042453 | <i>TBL1XR1</i>   | flanking_3UTR |
| rs2273508  | 5.48E-04 | 8.50E-04 | 6  | 90034567  | <i>GABRR2</i>    | intron        |
| rs7664958  | 5.50E-04 | 8.52E-04 | 4  | 172506527 | <i>AADAT</i>     | flanking_5UTR |
| rs11176241 | 5.52E-04 | 8.55E-04 | 12 | 65194084  | <i>HELB</i>      | flanking_3UTR |
| rs2294622  | 5.53E-04 | 8.56E-04 | 16 | 1536260   | <i>C16orf30</i>  | intron        |
| rs2004375  | 5.53E-04 | 8.58E-04 | 8  | 130071912 | <i>CCDC26</i>    | flanking_3UTR |
| rs1872901  | 5.57E-04 | 8.63E-04 | 11 | 103294671 | <i>PDGFD</i>     | intron        |
| rs7205853  | 5.59E-04 | 8.66E-04 | 16 | 10435114  | <i>ATF7IP2</i>   | intron        |
| rs10483393 | 5.60E-04 | 8.67E-04 | 14 | 31530235  | <i>C14orf128</i> | flanking_3UTR |
| rs2061342  | 5.67E-04 | 8.77E-04 | 17 | 34659183  | <i>FBXL20</i>    | flanking_3UTR |
| rs7310659  | 5.75E-04 | 8.89E-04 | 12 | 14201016  | <i>GRIN2B</i>    | flanking_5UTR |
| rs3861866  | 5.76E-04 | 8.89E-04 | 9  | 127060695 | <i>GAPVD1</i>    | flanking_5UTR |
| rs6451870  | 5.77E-04 | 8.91E-04 | 5  | 20686228  | <i>CDH18</i>     | flanking_5UTR |
| rs4692346  | 5.77E-04 | 8.92E-04 | 4  | 25681683  | <i>KIAA0746</i>  | flanking_5UTR |
| rs10995190 | 5.79E-04 | 8.95E-04 | 10 | 63948688  | <i>ZNF365</i>    | intron        |
| rs13285154 | 5.82E-04 | 8.98E-04 | 9  | 31495016  | <i>ACO1</i>      | flanking_5UTR |
| rs1894814  | 5.83E-04 | 9.00E-04 | 12 | 8880044   | <i>A2ML1</i>     | intron        |
| rs10819043 | 5.83E-04 | 9.01E-04 | 9  | 127077066 | <i>GAPVD1</i>    | intron        |

|            |          |          |    |           |                  |               |
|------------|----------|----------|----|-----------|------------------|---------------|
| rs10235248 | 5.92E-04 | 9.13E-04 | 7  | 26470884  | <i>SNX10</i>     | flanking_3UTR |
| rs948445   | 5.92E-04 | 9.13E-04 | 11 | 67171068  | <i>ACY3</i>      | coding        |
| rs11029745 | 5.93E-04 | 9.14E-04 | 11 | 26916960  | <i>LOC387758</i> | flanking_5UTR |
| rs4074186  | 5.99E-04 | 9.24E-04 | 11 | 124453249 | <i>SLC37A2</i>   | intron        |
| rs7868264  | 6.00E-04 | 9.24E-04 | 9  | 137990431 | <i>UBADC1</i>    | intron        |
| rs4743641  | 6.00E-04 | 9.24E-04 | 9  | 105107354 | <i>CYLC2</i>     | flanking_3UTR |
| rs1038335  | 6.02E-04 | 9.28E-04 | 6  | 2577107   | <i>C6orf195</i>  | intron        |
| rs2268084  | 6.03E-04 | 9.30E-04 | 20 | 32095049  | <i>RALY</i>      | intron        |
| rs319920   | 6.08E-04 | 9.37E-04 | 6  | 64562211  | <i>PHF3</i>      | flanking_3UTR |
| rs330181   | 6.09E-04 | 9.37E-04 | 5  | 119059458 | <i>LOC340069</i> | flanking_3UTR |
| rs7432941  | 6.10E-04 | 9.39E-04 | 3  | 70345767  | <i>MITF</i>      | flanking_3UTR |
| rs632374   | 6.10E-04 | 9.39E-04 | 11 | 96331679  | <i>JRKL</i>      | flanking_3UTR |
| rs8137110  | 6.12E-04 | 9.42E-04 | 22 | 41141106  | <i>NFAMI</i>     | intron        |
| rs1696839  | 6.17E-04 | 9.49E-04 | 10 | 123499677 | <i>ATE1</i>      | intron        |
| rs9268832  | 6.20E-04 | 9.53E-04 | 6  | 32535767  | <i>HLA-DRA</i>   | flanking_3UTR |
| rs1378624  | 6.20E-04 | 9.54E-04 | 2  | 196753322 | <i>STK17B</i>    | flanking_5UTR |
| rs1529756  | 6.23E-04 | 9.58E-04 | 3  | 12976642  | <i>IQSEC1</i>    | intron        |
| rs7756268  | 6.30E-04 | 9.68E-04 | 6  | 51660261  | <i>PKHD1</i>     | intron        |
| rs2074565  | 6.32E-04 | 9.71E-04 | 14 | 68013900  | <i>RAD51L1</i>   | intron        |
| rs7553424  | 6.37E-04 | 9.79E-04 | 1  | 18232488  | <i>IGSF21</i>    | flanking_5UTR |
| rs4075387  | 6.38E-04 | 9.80E-04 | 15 | 99297554  | <i>ALDH1A3</i>   | flanking_3UTR |
| rs8018430  | 6.42E-04 | 9.85E-04 | 14 | 77727425  | <i>NRXN3</i>     | flanking_5UTR |
| rs10943755 | 6.45E-04 | 9.90E-04 | 6  | 81653169  | <i>BCKDHB</i>    | flanking_3UTR |
| rs2941503  | 6.46E-04 | 9.91E-04 | 17 | 35082271  | <i>PERLD1</i>    | 3UTR          |
| rs4837016  | 6.49E-04 | 9.96E-04 | 9  | 127181630 | <i>GAPVD1</i>    | flanking_3UTR |
| rs13077437 | 6.50E-04 | 9.96E-04 | 3  | 24457322  | <i>THRB</i>      | intron        |
| rs1955850  | 6.50E-04 | 9.97E-04 | 14 | 26193254  | <i>NOVA1</i>     | flanking_5UTR |

30 **Table E2.** Association results of 37 imputed SNPs in *RAD50*

31

| SNP              | Position  | P value  | Location                  |
|------------------|-----------|----------|---------------------------|
| rs12652920       | 131913139 | 1.36E-06 | 5' upstream               |
| rs2057687        | 131915144 | 1.46E-02 | 5' upstream               |
| rs2706338        | 131923748 | 9.98E-07 | intron 2                  |
| <b>rs2244012</b> | 131929124 | 3.04E-07 | intron 2                  |
| rs2299015        | 131929396 | 9.98E-07 | intron 2                  |
| rs2706347        | 131933016 | 9.98E-07 | intron 2                  |
| rs2706348        | 131933709 | 9.98E-07 | intron 2                  |
| rs17166050       | 131943112 | 9.98E-07 | intron 4, near RHS3       |
| rs2522403        | 131943216 | 9.98E-07 | intron 4, near RHS3       |
| rs2246176        | 131945249 | 9.98E-07 | intron 5                  |
| rs2252775        | 131946343 | 9.98E-07 | intron 5                  |
| rs10463893       | 131955938 | 9.98E-07 | intron 11                 |
| <b>rs2897443</b> | 131957493 | 2.74E-06 | intron 11                 |
| rs17622991       | 131960652 | 1.34E-06 | intron 13                 |
| rs2706370        | 131960915 | 1.65E-06 | intron 13                 |
| rs2706372        | 131963376 | 9.98E-07 | intron 13                 |
| rs6884762        | 131966629 | 9.23E-02 | intron 13                 |
| rs12187537       | 131967803 | 9.79E-07 | intron 15                 |
| rs2522394        | 131972028 | 9.79E-07 | intron 16                 |
| rs10520114       | 131976790 | 9.79E-07 | intron 19, near RHS4, LCR |
| rs2301713        | 131979895 | 1.49E-06 | intron 20, near RHS4, LCR |
| rs6596086        | 131980121 | 1.49E-06 | intron 20, near RHS4, LCR |
| rs2106984        | 131980965 | 1.49E-06 | intron 20, near RHS4, LCR |
| rs7449456        | 131981326 | 1.49E-06 | intron 20, near RHS4, LCR |
| rs17772583       | 131981409 | 2.28E-01 | intron 20, near RHS4, LCR |

|                  |           |          |                            |
|------------------|-----------|----------|----------------------------|
| rs3798135        | 131993008 | 1.49E-06 | intron 21, on RHS5/LCR-O   |
| rs3798134        | 131993078 | 1.49E-06 | intron 21, on RHS5/LCR-O   |
| rs6596087        | 131996508 | 1.49E-06 | intron 21, LCR             |
| <b>rs6871536</b> | 131997773 | 9.03E-07 | intron 21, LCR             |
| <b>rs2237060</b> | 131998784 | 1.12E-01 | intron 21, near RHS6/LCR-A |
| rs12653750       | 131999801 | 1.49E-06 | intron 21, on RHS6/LCR-A   |
| rs2040703        | 132000157 | 1.34E-06 | intron 21, near RHS6/LCR-A |
| rs2040704        | 132001076 | 1.33E-06 | intron 22, on RHS6/LCR-B   |
| rs2074369        | 132001562 | 8.36E-07 | intron 22, LCR             |
| rs7737470        | 132001962 | 1.94E-06 | intron 23, LCR             |
| rs2240032        | 132005026 | 6.68E-06 | intron 24, on RHS7/LCR-C   |
| rs2158177        | 132011957 | 1.48E-04 | 3' downstream              |

---

32

33 Bold faced SNPs were genotyped SNPs, others were imputed.

34

35 **Table E3.** 41 Association results of imputed SNPs in HLA-DR/DQ region ( $P \leq 1.0E-04$ )

| <b>SNP</b>       | <b>Position</b> | <b>Pvalue</b> | <b>Gene</b>     | <b>Location</b> |
|------------------|-----------------|---------------|-----------------|-----------------|
| <b>rs9268542</b> | 32492699        | 8.55E-05      | <i>BTNL2</i>    | flanking_5UTR   |
| rs9268544        | 32493431        | 8.55E-05      | <i>BTNL2</i>    | flanking_5UTR   |
| rs9268556        | 32494942        | 8.55E-05      | <i>BTNL2</i>    | flanking_5UTR   |
| rs9268644        | 32516022        | 6.55E-05      | <i>HLA-DRA</i>  | intron          |
| rs6926374        | 32517283        | 3.23E-05      | <i>HLA-DRA</i>  | intron          |
| rs9268657        | 32517634        | 6.54E-05      | <i>HLA-DRA</i>  | intron          |
| <b>rs2239804</b> | 32519501        | 2.80E-05      | <i>HLA-DRA</i>  | intron          |
| rs2239803        | 32519811        | 2.80E-05      | <i>HLA-DRA</i>  | intron          |
| rs9268831        | 32535726        | 2.43E-05      | <i>HLA-DRA</i>  | flanking_3UTR   |
| rs9268853        | 32537621        | 7.30E-05      | <i>HLA-DRA</i>  | flanking_3UTR   |
| rs9268858        | 32537736        | 7.30E-05      | <i>HLA-DRA</i>  | flanking_3UTR   |
| <b>rs2395185</b> | 32541145        | 1.00E-04      | <i>HLA-DRA</i>  | flanking_3UTR   |
| rs9405040        | 32547371        | 8.77E-05      | <i>HLA-DRA</i>  | flanking_3UTR   |
| rs9286790        | 32547806        | 8.77E-05      | <i>HLA-DRA</i>  | flanking_3UTR   |
| <b>rs2516049</b> | 32678378        | 2.93E-05      | <i>HLA-DRB1</i> | flanking_5UTR   |
| rs522308         | 32689900        | 4.34E-05      | <i>HLA-DRB1</i> | flanking_5UTR   |
| rs3828800        | 32744041        | 4.34E-05      | <i>HLA-DQB1</i> | flanking_5UTR   |
| rs9275184        | 32762692        | 1.26E-05      | <i>HLA-DQB1</i> | flanking_5UTR   |
| rs9275207        | 32765688        | 5.10E-06      | <i>HLA-DQB1</i> | flanking_5UTR   |
| rs9275221        | 32767077        | 5.10E-06      | <i>HLA-DQB1</i> | flanking_5UTR   |
| rs9275293        | 32771286        | 5.10E-06      | <i>HLA-DQB1</i> | flanking_5UTR   |
| <b>rs5000634</b> | 32771542        | 9.76E-05      | <i>HLA-DQB1</i> | flanking_5UTR   |
| rs7745040        | 32772310        | 3.23E-05      | <i>HLA-DQB1</i> | flanking_5UTR   |
| rs9275307        | 32772968        | 2.68E-06      | <i>HLA-DQB1</i> | flanking_5UTR   |
| rs9275310        | 32773297        | 4.72E-06      | <i>HLA-DQB1</i> | flanking_5UTR   |
| rs9275311        | 32773618        | 4.72E-06      | <i>HLA-DQB1</i> | flanking_5UTR   |

|                  |          |          |                 |               |
|------------------|----------|----------|-----------------|---------------|
| <b>rs9275312</b> | 32773706 | 1.13E-05 | <i>HLA-DQB1</i> | flanking_5UTR |
| rs9275313        | 32773737 | 5.95E-06 | <i>HLA-DQB1</i> | flanking_5UTR |
| rs9275319        | 32774273 | 1.28E-05 | <i>HLA-DQB1</i> | flanking_5UTR |
| rs9275324        | 32774613 | 4.72E-06 | <i>HLA-DQB1</i> | flanking_5UTR |
| rs9275328        | 32774800 | 1.24E-05 | <i>HLA-DQB1</i> | flanking_5UTR |
| rs9275330        | 32774853 | 1.12E-05 | <i>HLA-DQB1</i> | flanking_5UTR |
| rs9275334        | 32775085 | 2.68E-06 | <i>HLA-DQB1</i> | flanking_5UTR |
| rs9275338        | 32775321 | 1.13E-05 | <i>HLA-DQB1</i> | flanking_5UTR |
| rs9275351        | 32775771 | 2.68E-06 | <i>HLA-DQB1</i> | flanking_5UTR |
| rs9275356        | 32775828 | 2.68E-06 | <i>HLA-DQB1</i> | flanking_5UTR |
| rs9275592        | 32788598 | 2.68E-06 | <i>HLA-DQA2</i> | flanking_5UTR |
| rs7454108        | 32789461 | 2.68E-06 | <i>HLA-DQA2</i> | flanking_5UTR |
| rs3957146        | 32789508 | 2.68E-06 | <i>HLA-DQA2</i> | flanking_5UTR |
| rs3998159        | 32789997 | 1.45E-06 | <i>HLA-DQA2</i> | flanking_5UTR |
| rs9275599        | 32790407 | 2.96E-06 | <i>HLA-DQA2</i> | flanking_5UTR |

36

37 Bold faced SNPs were genotyped SNPs, others were imputed.

38



39 **Figure legends**

40 **Figure E1.** Cluster plot of 607 TENOR cases and 262 HapMap samples. PC1 and PC2 are the  
41 first and second principle component, respectively.

42

43 **Figure E2.** Principle components plot of 473 TENOR cases and 1,892 Illumina controls. PC1  
44 and PC2 are the first and second principle component, respectively.

45

46 **Figure E3.** GWAS qq-plot of 292,443 SNPs of 473 TENOR cases and 1,892 Illumina controls.  
47 Negative logarithm transformed expected P values are shown on the x-axis. Negative logarithm  
48 transformed observed P values are shown on the y-axis.

49

50 **Figure E4.** Association of rs2516049 with the expression of *HLA-DRB1* in lymphocytes based  
51 on GENEVAR dataset. X-axis represents copy numbers of minor allele of rs2516049. Y-axis  
52 represents the expression levels of *HLA-DRB1* in lymphocytes.

53

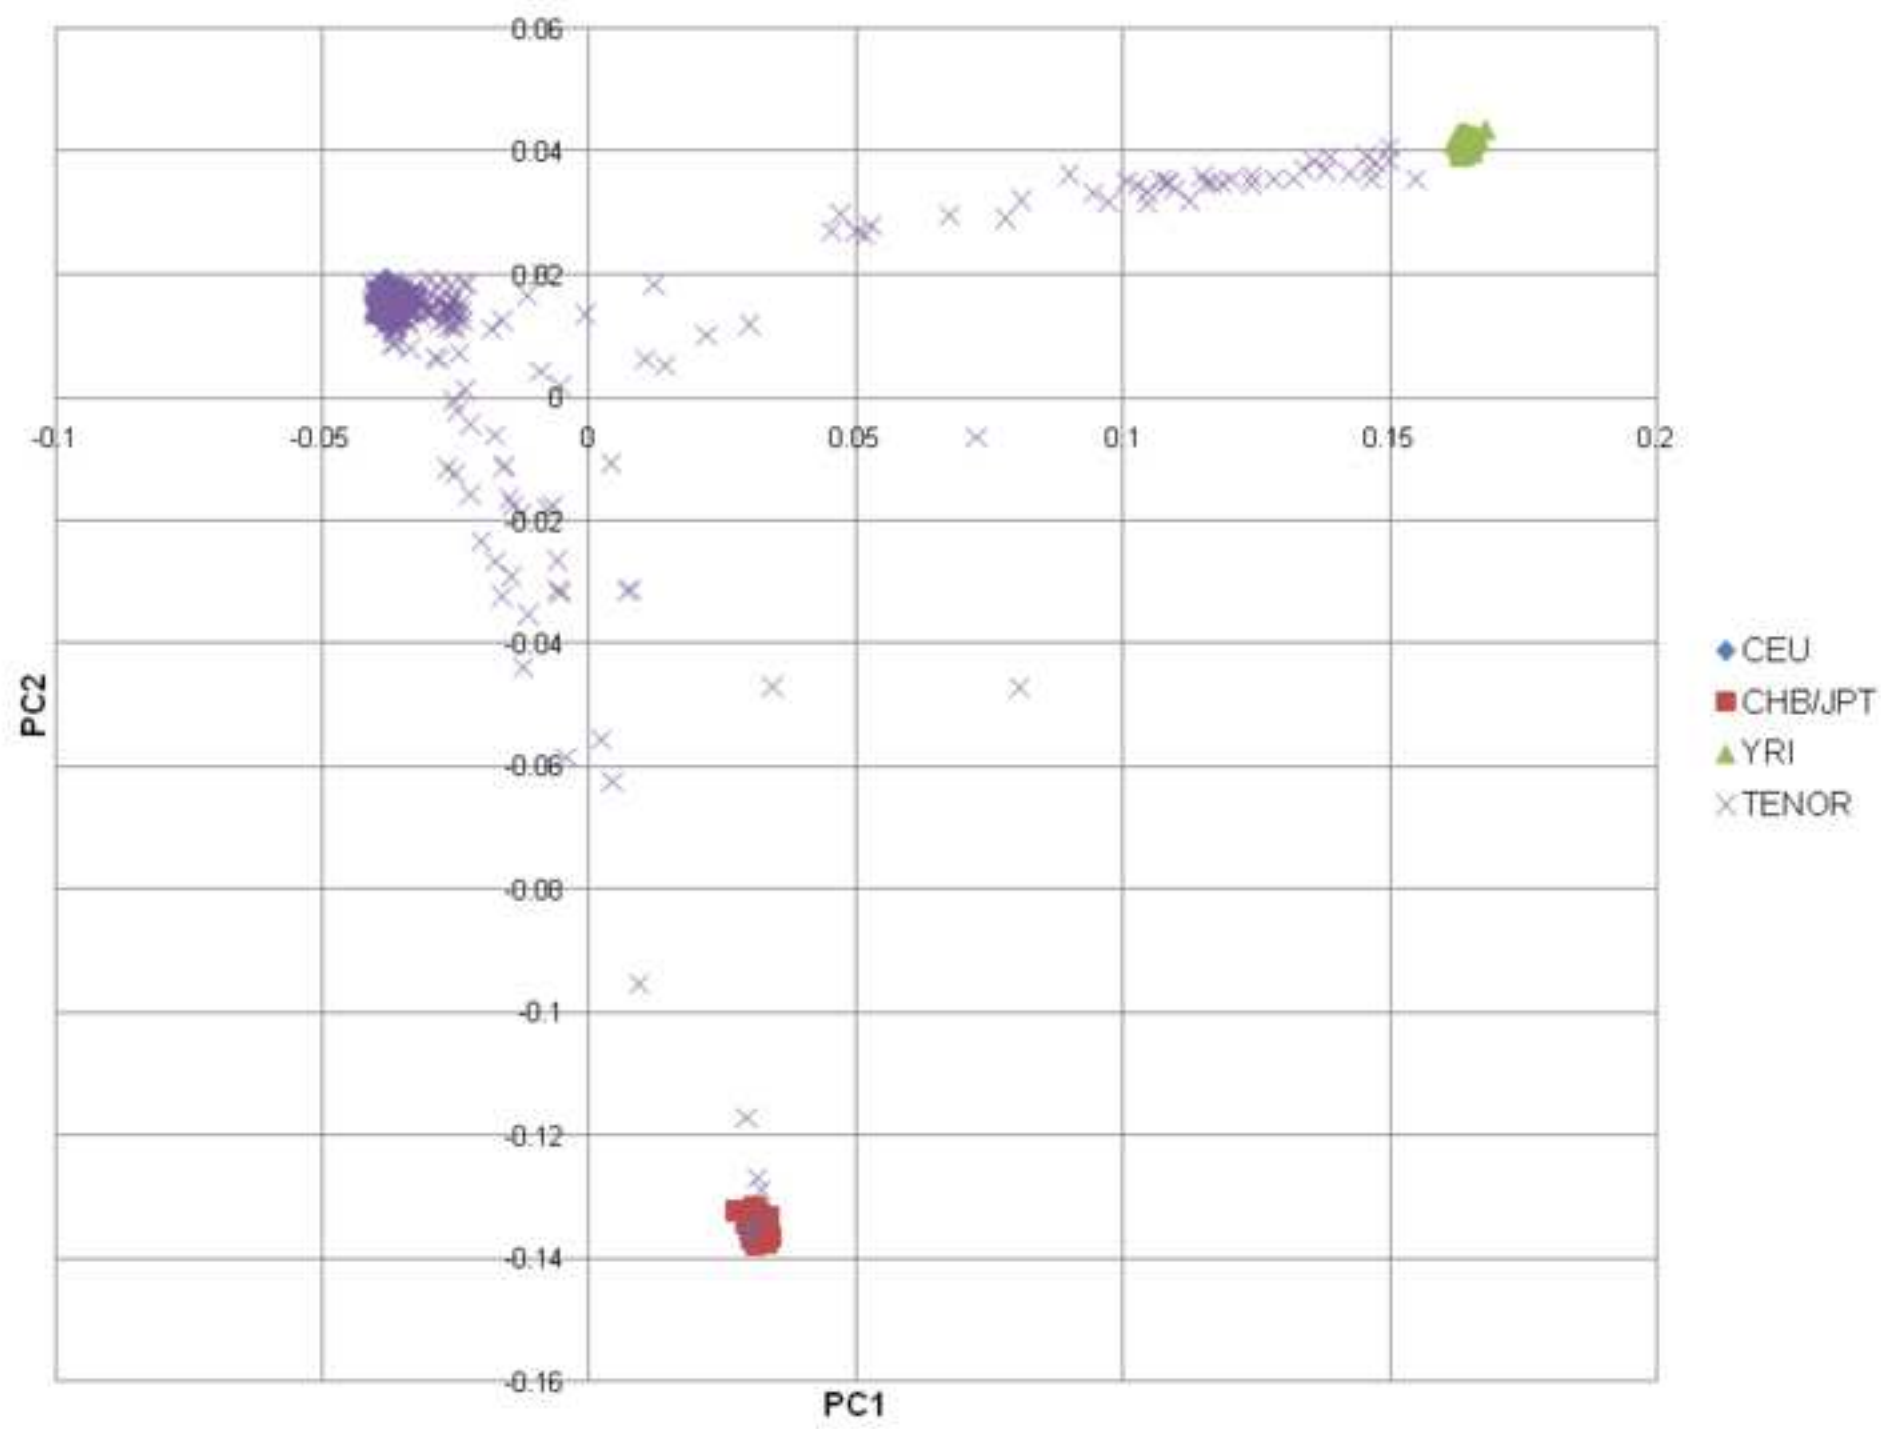

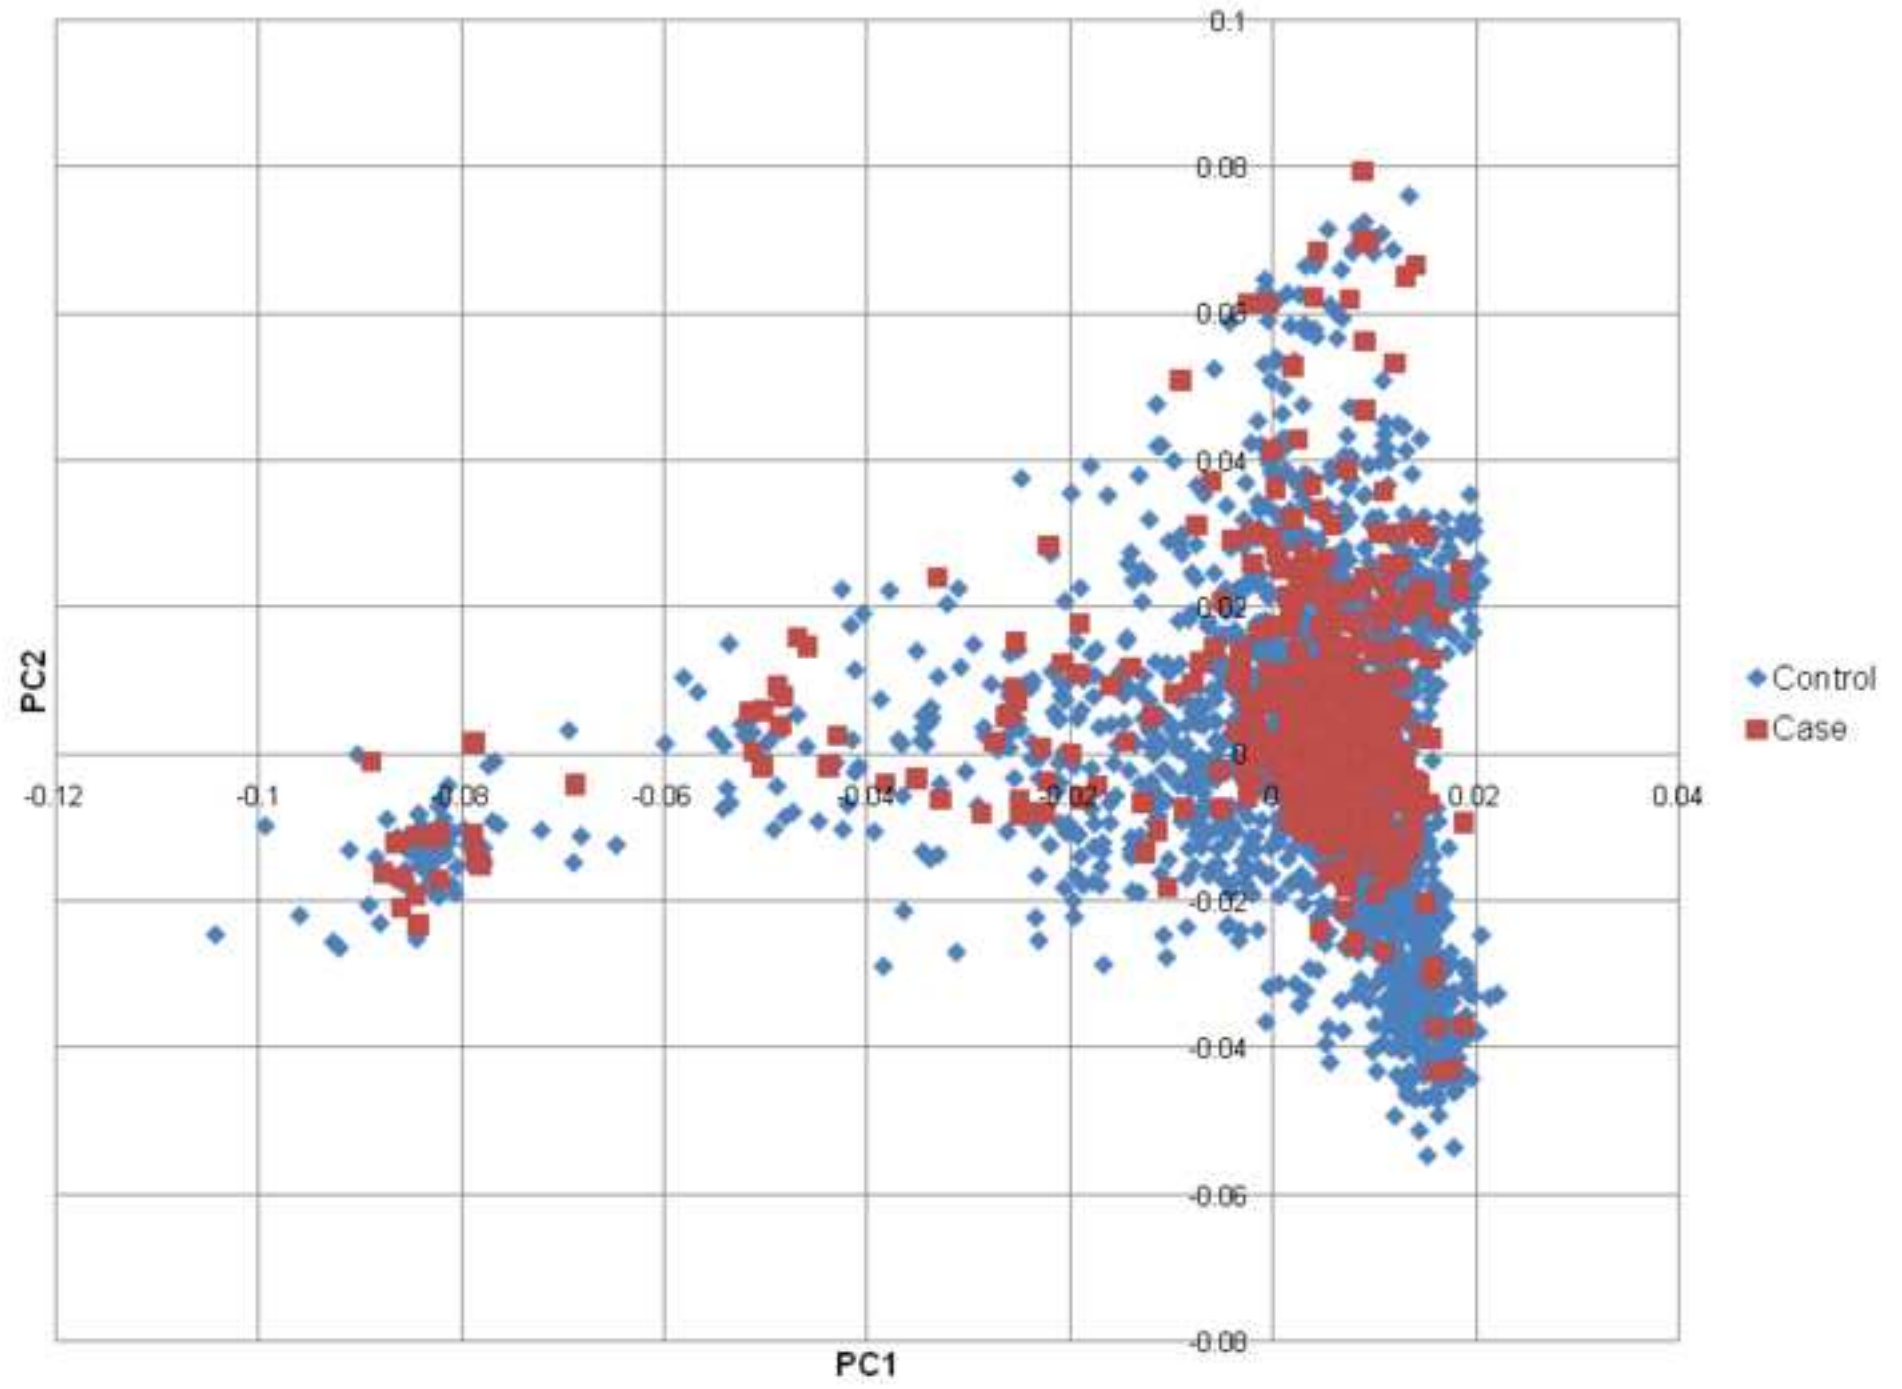

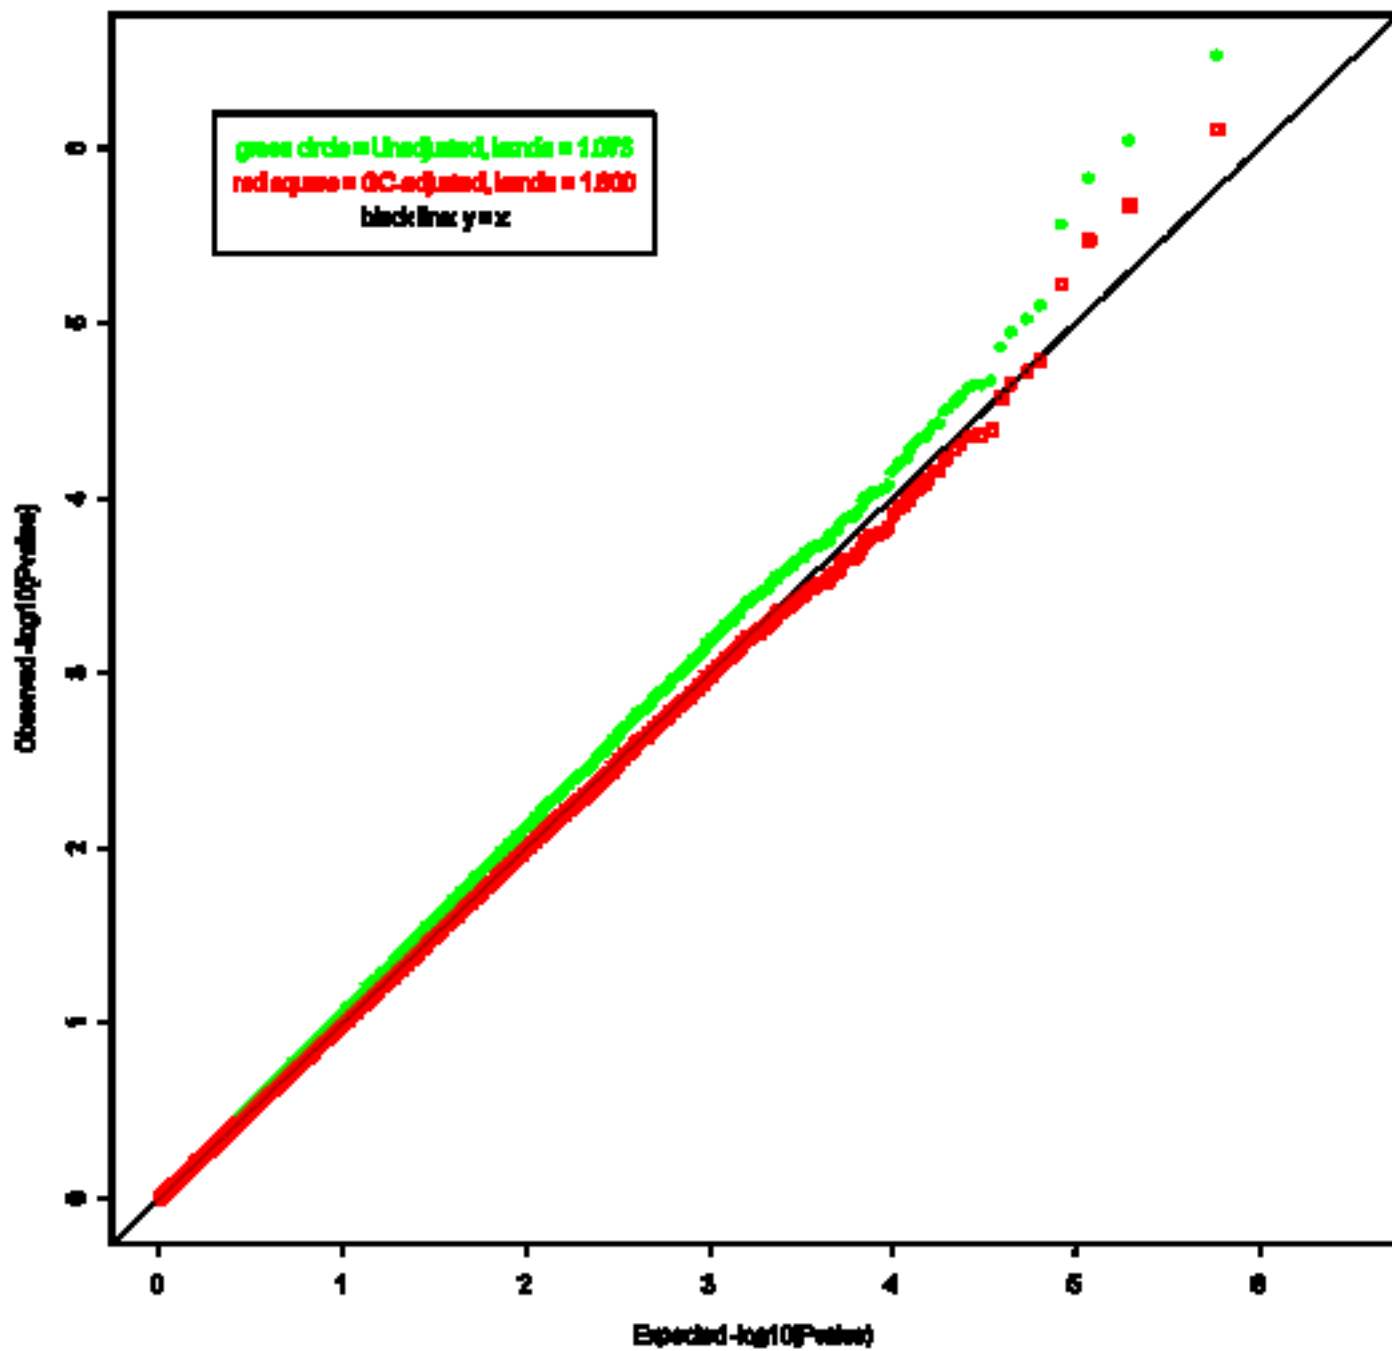

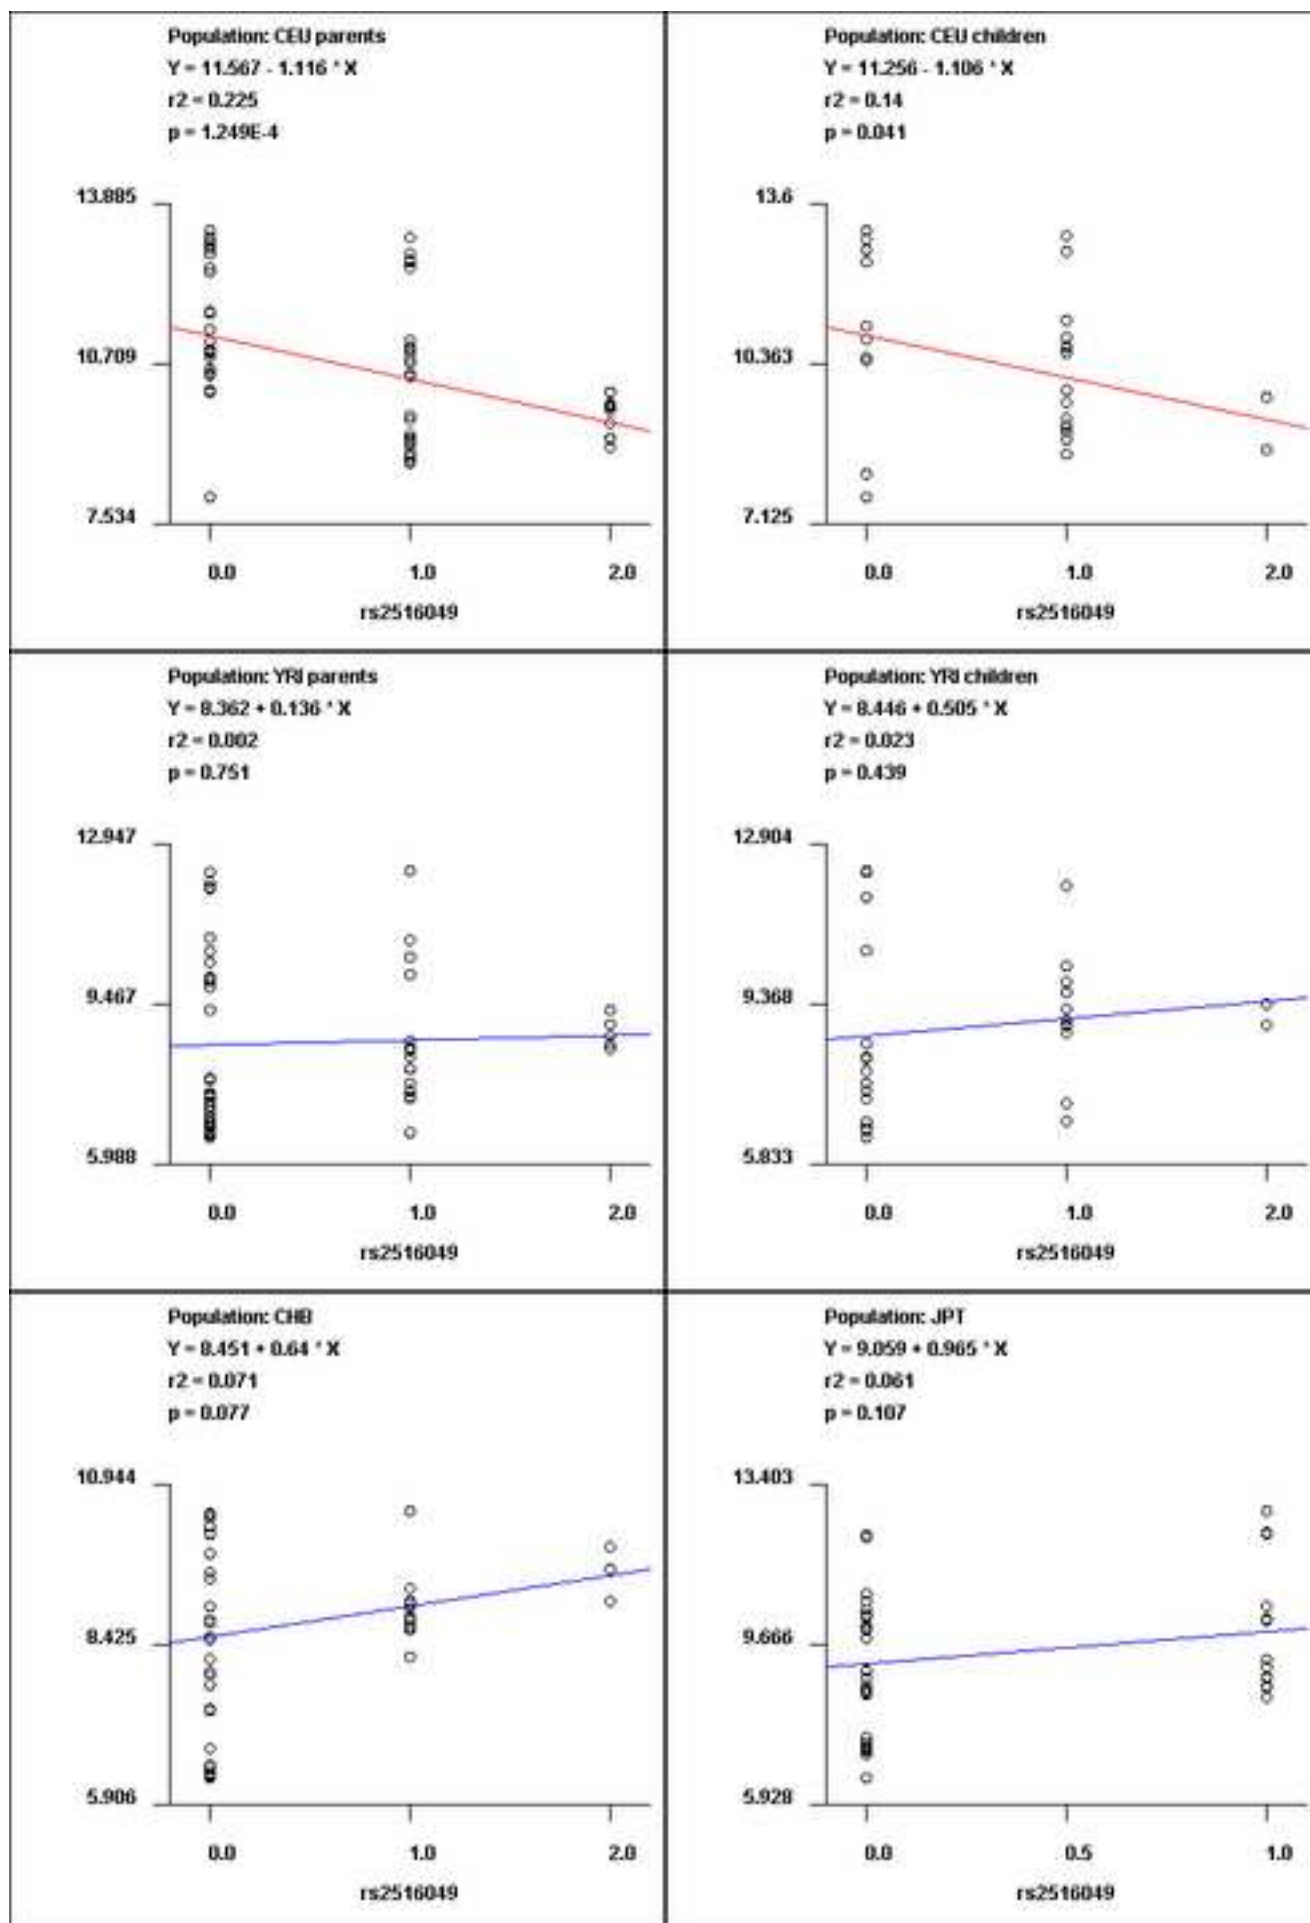

Supplement: NIHMS161893-supplement-01.pdf [file NIHMS161893-supplement-01.pdf]
